# Supplementary material for: A Comparison of Homogenization vs. Enzymatic Lysis for Microbiome Profiling in Clinical Endoscopic Biopsy Tissue Samples
Source: Front Microbiol. 2019 Jan 8;9:3246. doi: 10.3389/fmicb.2018.03246 (PMC6331478; doi:10.3389/fmicb.2018.03246)
Supplement: Table S2 — Species-level identification results of WGS samples. [file Table_2.XLSX]

## Sheet: Microbiome_species_level
Species	Homogenization	Lysis
Atopobium_parvulum		✔
Bifidobacterium_dentium		✔
Campylobacter_concisus	✔	✔
Fusobacterium_nucleatum		✔
Haemophilus_influenzae	✔	✔
Haemophilus_parainfluenzae	✔	✔
Helicobacter_acinonychis	✔	✔
Helicobacter_cetorum	✔	✔
Helicobacter_pylori	✔	✔
Lactobacillus_gasseri	✔	✔
Lactobacillus_reuteri	✔	✔
Mycobacterium_chubuense	✔	✔
Mycobacterium_gilvum	✔	✔
Mycobacterium_vanbaalenii	✔	✔
Pantoea_ananatis		✔
Prevotella_denticola	✔
Prevotella_melaninogenica	✔	✔
Propionibacterium_acnes	✔	✔
Propionibacterium_avidum	✔	✔
Pseudomonas_mendocina		✔
Rothia_dentocariosa	✔	✔
Rothia_mucilaginosa	✔	✔
Staphylococcus_aureus	✔	✔
Staphylococcus_epidermidis	✔	✔
Staphylococcus_warneri	✔
Streptococcus_gordonii	✔	✔
Streptococcus_mitis	✔	✔
Streptococcus_oralis	✔	✔
Streptococcus_parasanguinis	✔	✔
Streptococcus_pneumoniae		✔
Streptococcus_pseudopneumoniae		✔
Streptococcus_salivarius	✔	✔
Streptococcus_sanguinis	✔	✔
Tannerella_forsythia		✔
Veillonella_parvula	✔	✔
		Lysis Only
		Homogenization only
		Either methods
